# Supplementary material for: Structural Study of Monomethyl Fumarate-Bound Human GAPDH
Source: PubMed Central journal article supplement — Mol Cells. 2019 Aug 6;42(8):597–603. doi: 10.14348/molcells.2019.0114 (PMC6715340; doi:10.14348/molcells.2019.0114), 2019-08-06
Supplement: molce-42-597_supple.pdf [file molce-42-597_supple.pdf]

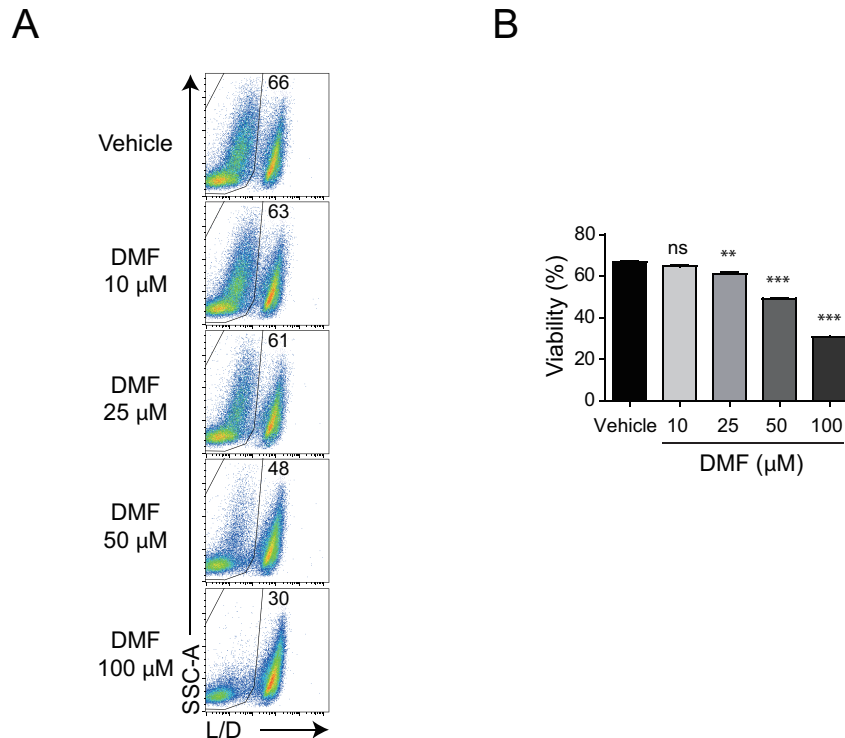

**Supplementary Figure 1. Representative flow cytometric plot of live cells in the presence of DMF.** CellTrace-Violet (CTV)-labelled human peripheral blood mononuclear cells (PBMCs) were activated by 3  $\mu$ g/ml soluble  $\alpha$ -CD3 or 3  $\mu$ g/ml soluble  $\alpha$ -CD28 antibody in medium alone or supplemented with indicated doses of DMF for four days. **A.** Representative flow cytometric plot of live cells gated on lymphocytes. **B.** Frequency of live cells as in **A.** Results are representative of three independent experiments. Data are the average  $\pm$  SEM and statistical significance was determined by two-tailed unpaired Student's t-test. \* $p < 0.05$ ; \*\* $p < 0.01$ ; \*\*\* $p < 0.001$ ; ns, not significant.

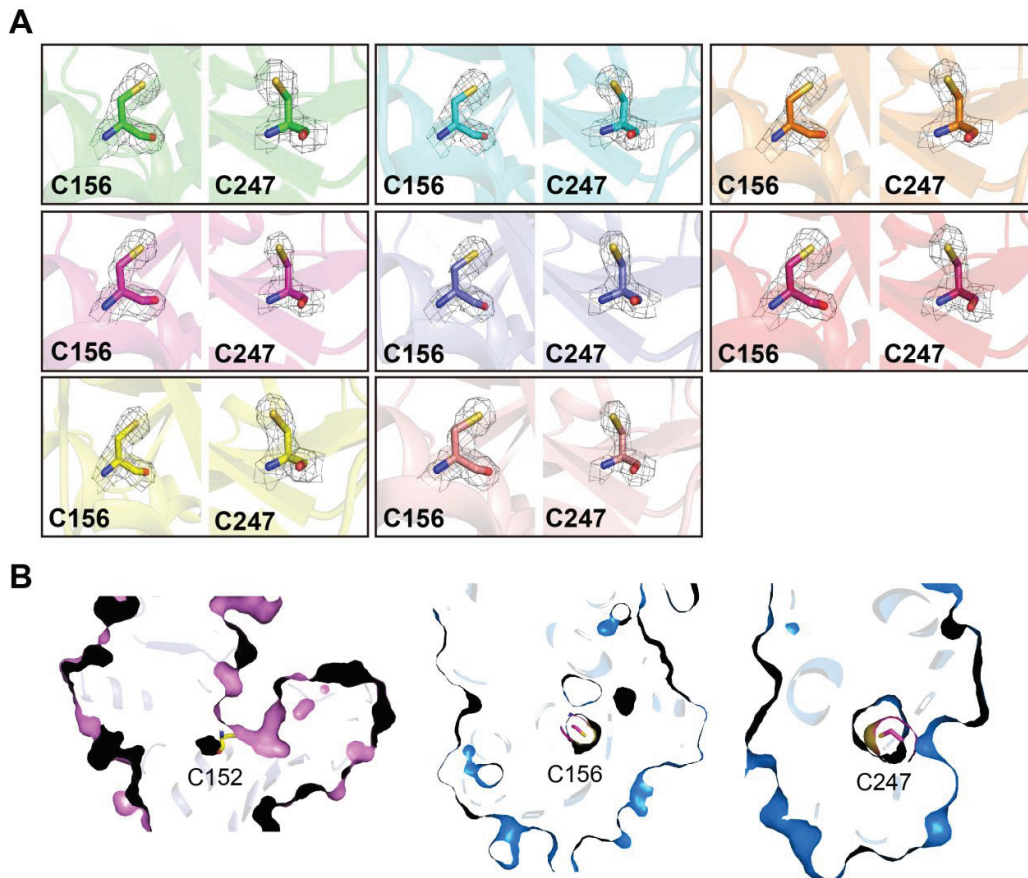

**Supplementary Figure 2. Spatial position of Cys152, Cys156, and Cys247 and the electron density map of Cys156 and Cys247.** **A.** Spatial position of the three independent cysteines that can be modified by MMF or DMF. **B.** The electron density map of Cys156 and Cys247 in the eight hGAPDH protomers located in a single asymmetric unit (contour 1.5  $\sigma$ ).

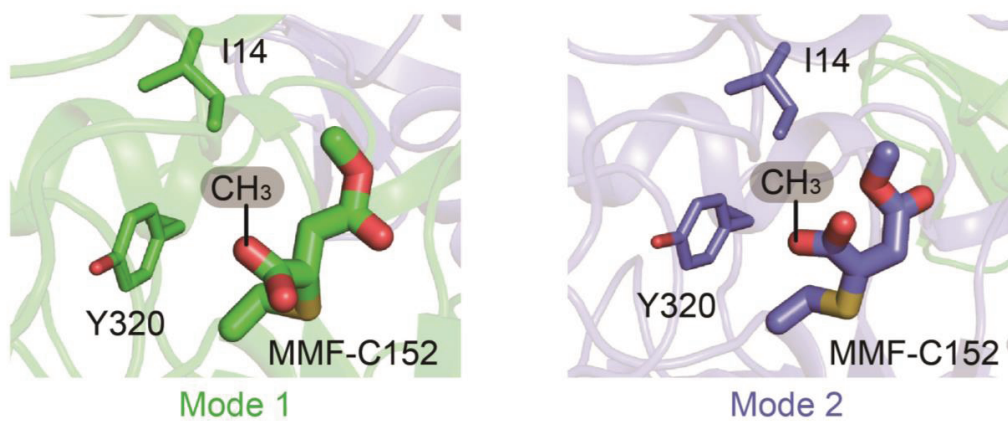

**Supplementary Figure 3. Structural insight of DMF-bound hGAPDH.** Ile14 and Tyr320 as putative DMF stabilizing residues might interact with the methyl group of DMF via hydrogen bonding in the structural view.
